1                    **SUMOylation regulates protein cargo in Astrocyte-derived small**  
2                                            **extracellular vesicles**

3            Anllely Fernández<sup>1</sup>; Maxs Méndez<sup>1</sup>; Octavia Santis<sup>1</sup>; Katherine Corvalan<sup>1</sup>; Maria-Teresa Gomez<sup>1</sup>;  
4                                            Peter Landgraf<sup>2</sup>; Thilo Kahne<sup>3</sup>; Alejandro Rojas-Fernandez<sup>4</sup>; Ursula Wyneken<sup>1\*</sup>

5            <sup>1</sup> Centro de Investigación e Innovación Biomédica (CIIB), Facultad de Medicina, Universidad de los Andes,  
6            Santiago 7620001, Chile.

7            <sup>2</sup> Institute for Pharmacology and Toxicology, Otto-von-Guericke University Magdeburg, Germany, 26 39120  
8            Magdeburg, Germany.

9            <sup>3</sup> Institute of Experimental Internal Medicine, Medical Faculty, Otto von Guericke University, 39120  
10            Magdeburg, Germany.

11            <sup>4</sup> Instituto de Medicina & Centro Interdisciplinario de Estudios del Sistema Nervioso (CISNe), Universidad  
12            Austral de Chile, Valdivia 5110566, Chile.

13  
14  
15            \* Corresponding author: Ursula Wyneken, Laboratorio de Neurociencias, Centro de Investigación Biomédica,  
16            Facultad de Medicina, Universidad de los Andes; Mons. Alvaro del Portillo 12.455, Las Condes; Santiago, Chile;  
17            e-mail: [uwyneken@uandes.cl](mailto:uwyneken@uandes.cl)

18  
19  
20  
21  
22  
23  
24  
25  
26  
27  
28  
29  
30  
31  
32

## 33 ABSTRACT

34 Recent studies have described a new mechanism of intercellular communication mediated by  
35 various types of extracellular vesicles (EVs). In particular, exosomes are small EVs (sEVs) released to  
36 the extracellular environment by the fusion of the endosomal pathway-related multivesicular  
37 bodies (containing intraluminal vesicles) with the plasma membrane. sEVs contain a molecular cargo  
38 consisting of lipids, proteins, and nucleic acids. However, the loading mechanisms for this complex  
39 molecular cargo have not yet been completely elucidated. In that line, the post translational  
40 modification SUMO (Small Ubiquitin-like Modifier) has been shown to impact the incorporation of  
41 select proteins into sEVs. We therefore decided to investigate whether SUMOylation is a  
42 mechanism that defines protein loading to sEVs. In order to investigate the role of SUMOylation  
43 in cargo loading into sEVs, we utilized astrocytes, an essential cell type of the central nervous system  
44 with homeostatic functions, to study the impact of SUMOylation on the protein cargo of sEVs.  
45 Following SUMO overexpression, achieved by transfection of SUMO plasmids or experimental  
46 conditions that modulate SUMOylation in primary astrocyte cultures, we detected proteins related  
47 to cell division, translation, and transcription by mass-spectrometry. In astrocyte cultures treated  
48 with the general SUMOylation inhibitor 2-D08 (2',3',4'-trihydroxy-flavone, 2-(2,3,4-  
49 Trihydroxyphenyl)-4H-1-Benzopyran-4-one) we observed an increase in the number of sEVs and a  
50 decreased amount of protein cargo within them. In turn, in astrocytes treated with the stress  
51 hormone corticosterone, we found an increase of SUMO-2 conjugated proteins and sEVs from these  
52 cells contained an augmented protein cargo. In this case, the proteins detected with mass-  
53 spectrometry were mostly proteins related to protein translation. To test whether astrocyte-derived  
54 sEVs obtained in these experimental conditions could modulate protein synthesis in target cells, we  
55 incubated primary neurons with astrocyte-derived sEVs. sEVs from corticosterone-treated  
56 astrocytes stimulated protein synthesis while no difference was found with sEVs derived from 2-  
57 D08-treated astrocytes. Our results show that SUMO conjugation plays a fundamental role in  
58 defining the protein cargo of sEVs impacting the physiological function of target cells.

59

60 **Keywords:** sEV; exosomes; SUMOylation; post-translational modification; astrocytes; neurons.

61

## 62 INTRODUCTION

63 Extracellular vesicles (EVs), i.e. extracellular structures enclosed by a lipid bilayer, are novel players  
64 in intercellular communication (Mathieu, Martin-Jaular, Lavieu, & Théry, 2019; Van Niel, D'Angelo,  
65 & Raposo, 2018). EVs that are released after the fusion of multivesicular bodies (MVBs) with the  
66 plasma membrane, allowing the secretion of intraluminal vesicles (ILVs) of a diameter from 30 to  
67 160 nm, are termed exosomes. In turn, when EVs are generated directly from the plasma  
68 membrane, their diameter varies between 30 nm and 1  $\mu$ m, and they are called microvesicles. Given  
69 the heterogeneity of EV preparations, exosome-containing fractions are now more precisely termed  
70 small extracellular vesicles (sEVs) (Colombo, Raposo, & Théry, 2014; Witwer & Théry, 2019).  
71 Remarkably, the molecular content (i.e. lipids, proteins and nucleic acids) of sEVs depends on the  
72 physiological or pathophysiological state of the donor cell (Mathieu et al., 2019). Regarding proteins,  
73 sEVs contain a common protein pattern (or protein markers), such as CD63, CD9, Flotillin or TSG101,

74 as well as a cell type-specific and physiological state-dependent protein cargo (Doyle & Wang, 2019;  
75 Jeppesen et al., 2019; Kowal et al., 2016; Zhang, Liu, Liu, & Tang, 2019).

76 The transfer of sEVs to target cells can regulate the recipient cell function in a cargo-dependent  
77 manner, e.g. influencing the development or progression pathophysiological processes (Isola &  
78 Chen, 2016; Kalluri & LeBleu, 2020). It is therefore of great relevance to understand precisely the  
79 mechanisms involved in the loading of biomolecules, which will define the biological effect of sEVs.

80 The mechanisms that participate in the biogenesis of sEVs may act independently or in coordination  
81 with the classification/loading of molecules into the vesicles (Simons & Raposo, 2009). The first  
82 mechanism described depends on the endosomal sorting complex required for transport (ESCRT),  
83 composed of 4 multiproteic complexes (0 to III). Secondly, ceramides constitute a primary lipid  
84 factor with physical and structural properties that facilitate the biogenesis of intra-luminal vesicles  
85 (Holopainen, Angelova, & Kinnunen, 2000; Simons & Raposo, 2009). The third mechanism is through  
86 tetraspanins, which are capable of modulating the formation of membrane microdomains, playing  
87 a fundamental role not only in the formation of vesicles, but also in the selection of proteins that  
88 are specifically incorporated into them (Zhang et al., 2019).

89 Post-translational modifications that contribute to the selective loading of proteins into sEVs include  
90 protein modification by ubiquitin and ubiquitin-like proteins (UBLs) such as SUMO (Small Ubiquitin-  
91 like Modifier) (Ageta & Tsuchida, 2019; Colombo et al., 2014). SUMO conjugation to lysine residues  
92 impacts on the function of proteins and importantly, the formation of multi-protein complexes (J.  
93 M. Desterro, Thomson, & Hay, 1997; Johnson & Blobel, 1997). Moreover, SUMO can interact in a  
94 non-covalent manner to SUMO interactive motif, also known as SIM (Hecker, Rabiller, Haglund,  
95 Bayer, & Dikic, 2006; Song, Durrin, Wilkinson, Krontiris, & Chen, 2004). There are three functional  
96 SUMO homologs in mammals with a molecular weight of ~10kDa: SUMO-1, SUMO-2, SUMO-3 (J. M.  
97 P. Desterro, Rodriguez, Kemp, & Ronald T, 1999; Liang et al., 2016; Melchior, 2000). SUMOylation  
98 regulates the activity, stability, and sub-cellular localization of proteins, primarily modifying protein-  
99 protein interactions (Geiss-Friedlander & Melchior, 2007). SUMO modification is involved in a wide  
100 variety of cellular processes, affecting among others translation, transcription, replication,  
101 chromosome segregation, DNA repair, differentiation, apoptosis, senescence, cell cycle, nuclear  
102 transport and signal transduction (Hay, 2005; Hendriks & Vertegaal, 2016; Khan, Pandupuspitasari,  
103 Huang, Hao, & Zhang, 2016; Pichler, Fatouros, Lee, & Eisenhardt, 2017).

104 This modification affects the ability of the ribonucleoprotein hnRNPA2B1 to export microRNAs  
105 (miRNAs) in sEVs (Villarroya-Beltri et al., 2013). Moreover,  $\alpha$ -synuclein is SUMOylated in the sEV  
106 lumen while GFP is sorted into sEVs only when it is conjugated with SUMO-2 (Kunadt et al., 2015).  
107 In the same context, in homogenized primary astrocyte cultures, the glycolytic enzyme Aldolase C  
108 (ALDOC) is detected with two molecular weights: 36kDa (expected weight) and 55kDa (the  
109 putatively SUMO-conjugated form). Importantly, in rat serum sEVs, only the high molecular weight  
110 form of the enzyme can be found suggesting that SUMOylation determines the loading of this  
111 enzyme (Gómez-Molina et al., 2019). In summary, these results strongly support the concept that  
112 SUMO conjugation of proteins might dynamically regulate the classification and loading of proteins  
113 in sEVs. Previously, the effect of SUMOylation as a general loading mechanism in sEVs had not  
114 been described, neither were the proteins SUMOylated within sEVs. In the present work, we  
115 describe that SUMOylation regulates the protein cargo of sEVs derived from HeLa cells and  
116 astrocytes. Identification of proteins by mass spectrometry indicates that after stimulation of

117 SUMOylation in donor cells (by SUMO overexpression or corticosterone treatment), proteins related  
118 to cell division, transcription and translation are enhanced in sEVs. Moreover, sEVs derived from  
119 corticosterone-treated donor astrocytes increase *de novo* protein synthesis in target neurons.

120

## 121 **METHODOLOGY**

122 **Reagents and antibodies.**  $\alpha$ ALDOA (#390733),  $\alpha$ ALIX (#53540),  $\alpha$ EF-2 (#166415),  $\alpha$ SUMO-1 (#5308)  
123 were purchased from Santa Cruz (Dallas, Texas).  $\alpha$ FLOTILLIN (#610820) and  $\alpha$ GM130 (#610823),  
124 were purchased from BD Transduction Labs (New Jersey, USA). Goat anti mouse (#926-80010), Goat  
125 anti rabbit (#926-80011) were purchased from Licor (Nebraska, USA). Donkey anti Sheep (#16041),  
126 Alexa Fluor 488 mouse (#A21202), DMEM medium (#12100046), Fetal bovine serum (#26140079),  
127 G418 (#11811023) Penicillin/Streptomycin (#15140122), neurobasal medium (#21103049), B27  
128 (#17504044), OptiMEM (#31985062), Lipofectamine (#11668030), PBS (#14190), Total Exosome  
129 Isolation kit (#4478359), chemiluminescence kit (#32106), DMSO (#85190), IL-1 $\beta$  (#14-8018-62),  
130 MOWIOL (#81381) were purchased from Thermo Fisher (Massachusetts, USA). N-Ethylmaleimide  
131 (NEM, #34115), DAPI (4',6-diamidino-2-phenylindole; D9542), Poly-D-Lysine (#4174),  
132 Corticosterone (#27840), 2-D08 (#1052) were purchased from Sigma (Missouri, USA). MAP2  
133 (#MAB378) was purchased from Millipore (Massachusetts, USA).  $\alpha$ GFAP (#G2032) were purchased  
134 from US Biological (Massachusetts, United States). Cheap  $\alpha$ SUMO-2 was generously donated by Dr.  
135 Ronald T. Hay, University of Dundee, UK.

136 **Cell culture.** HeLa cells were maintained in DMEM containing 10% Fetal bovine serum with 100  
137 units/ml of penicillin and 100  $\mu$ g/ml of streptomycin and 200  $\mu$ g/ml of G418 (for maintaining stable  
138 cell lines) incubated at 37°C, with 5% CO<sub>2</sub> and 95% humidity. Astrocytes were obtained from the  
139 telencephalon of post-natal rats (at postnatal day 1) as already described (Luarte et al., 2020).  
140 Astrocytes were maintained in DMEM containing 10% Fetal bovine serum with 100 units/ml of  
141 penicillin and 100  $\mu$ g/ml of streptomycin incubated at 37°C, with 5% CO<sub>2</sub> and 95% humidity. On days  
142 4 and 8 *in vitro* (DIV), a total change of medium was made. After 15 DIV, the astrocytes were re-  
143 plated to decrease the presence of microglia and seeded at a confluence of 70-80%. Cortical  
144 neurons of the rat embryo brain (E18) were dissociated from the cerebral cortex and 20,000-40,000  
145 cells were seeded on coverslips coated with Poly-D-Lysine using 35mm plates. Cortical neurons were  
146 maintained *in vitro* for 15 days in neurobasal medium supplemented with B27 and 100 units/mL of  
147 penicillin and 100  $\mu$ g/mL of streptomycin incubated at 37°C, with 5% CO<sub>2</sub> and 95% humidity. Cells  
148 were cultured in plates until they reached 60% confluence or after 15DIV (astrocytes and cortical  
149 neurons). At that time, some wells were transfected or treated with different reagent, as indicated  
150 in each case. At the end of these treatments, cells were trypsinized, resuspended in phosphate-  
151 buffered saline (PBS) and an aliquot was counted using a Neubauer chamber.

152 **Transfections.** Transfections were performed after reaching 60% cell confluence using a 3:1 ratio of  
153 DNA: Lipofectamine in Opti-MEM. pCDNA3.1 HIS-SUMO-1 and HIS-SUMO-2 plasmid were  
154 generously donated by Dr. Ronald T. Hay, University of Dundee, UK.

155 **Obtaining sEVs.** Cell cultures were grown in a sEV free culture medium for 72 hours (DMEM with  
156 10% FBS, depleted by ultracentrifugation for 2 hours at 100,000xg). Then, the conditioned media of  
157 these cells was harvested to isolate sEVs by ultracentrifugation. sEVs were isolated by serial  
158 centrifugations as already described (Luarte et al., 2020; Théry, Amigorena, Raposo, & Clayton,

159 2006): After 30 minutes at 2,000g the supernatant was recovered, the centrifuged for 45 minutes  
160 at 10,000g. Then the supernatant was centrifuged for 2 hours at 100,000g, the supernatant was  
161 eliminated and the sEV enriched pellet was washed and re-suspended in PBS and stored at -80°C  
162 until use. Or, using Total Exosome Isolation kit (Thermo-Fisher), the sEV containing fraction was  
163 obtained by centrifugation for 30 minutes at 2,000g. The supernatant was resuspended with 0.5  
164 volumes of the Total Exosome Isolation solution and incubated overnight at 4°C. Then the mix was  
165 centrifuged for 1 hour at 10,000g and the pellet was resuspended in PBS and stored at -80°C until  
166 use.

167 **Nanoparticle tracking analysis.** The nano particle tracking analysis (Nanosight NS300, Malvern  
168 Instruments, Malvern, UK) was used to determine particle concentration and size distribution.  
169 Samples were diluted 5 or 10 times in PBS to obtain ≥80 particles per field for analysis and 3 videos  
170 were recorded with a duration of 30 seconds each.

171 **Western blots.** Cells were lysed in RIPA buffer (150mM NaCl, 25mM Tris-HCL pH 7.4, NP-40, 0.5%  
172 sodium deoxycholate, 20mM NEM (N-Ethylmaleimide)). Protein quantification of the homogenates  
173 and sEVs (sEV resuspended with with 0.1% SDS) were determined using the BCA method (Smith et  
174 al., 1985). The samples were boiled with loading buffer and 20mM NEM (N-ethyl-maleimide, modify  
175 cysteine residues in proteins and peptides) for 5 minutes at 100°C. Each lane was loaded with either  
176 the same amount of total protein or the same number of vesicles, as depicted. Proteins were  
177 separated in 12% polyacrylamide gels under denaturing conditions. Gels were stained with  
178 Coomassie dye or transferred to nitrocellulose membranes. The membranes were incubated with  
179 blocking solution (5% nonfat milk in PBS) for one hour, then incubated over night with primary  
180 antibody. The membranes were washed with PBS. Finally, they were incubated with secondary  
181 antibody for 45 minutes and then visualized with a chemiluminescence kit (Pierce ECL #32109).

182 **SIM-SUMO pulldown.** SIM-HALO resins consisting of the SIM sequence fused with a HALO tag and  
183 linked to a resin were incubated with 200 µg of sEV protein with RIPA buffer and 20mM NEM for 16  
184 hours at 4°C. They were centrifuged at 500xg for 5 min and washed 8 times with RIPA with 20mM  
185 NEM. The supernatant was removed each time. Finally, the pellet was resuspended with loading  
186 buffer and 20mM NEM, the samples were boiled, and centrifuged at 10,000xg for 10 minutes and  
187 then analyzed by SDS-PAGE followed by Coomassie staining. 10% of the Input eluates were loaded.

188 **Proteomics.** sEV proteins were separated using polyacrylamide gradient gel electrophoresis. Each  
189 lane was divided into 8 sections to perform in-gel digestion. Liquid chromatography followed by  
190 tandem-mass spectrometry (MS/MS) of the sample fractions was performed on a hybrid dual-  
191 pressure linear ion trap/orbitrap mass spectrometer (LTQ Orbitrap Velos Pro, Thermo Scientific)  
192 equipped with an EASY-nLC Ultra HPLC (Thermo Scientific). Peptide samples were dissolved in 10 µL  
193 of 2% acetonitrile/0.1% trifluoric acid and fractionated on a 75-µm i.d., 25-cm PepMap C18-column,  
194 packed with 2 µm of resin (Dionex, Germany). Separation was achieved by applying a gradient of 2%  
195 to 35% acetonitrile in 0.1% formic acid over 150 minutes at a flow rate of 300 nL/min. The LTQ  
196 Orbitrap Velos Pro MS was exclusively used for CID fragmentation when acquiring MS/MS spectra,  
197 which consisted of an orbitrap full mass spectrometry (MS) scan followed by up to 15 LTQ MS/MS  
198 experiments (TOP15) on the most abundant ions detected in the full MS scan. The essential MS  
199 settings were as follows: full MS (resolution, 60,000; mass to charge ratio range, 400–2000); MS/MS  
200 (Linear Trap; minimum signal threshold, 500; isolation width, 2 Da; dynamic exclusion time setting,  
201 30 seconds; and singly charged ions were excluded from the selection). Normalized collision energy

202 was set to 35%, and activation time was set to 10 milliseconds. Raw data processing and protein  
203 identification were performed by ProteomeDiscoverer 1.4 (Thermo Scientific) and a combined  
204 database search used the Sequest and Mascot algorithms. The false discovery rate was calculated  
205 by the Percolator 2.04 algorithm and was set to <1%. An Ingenuity Pathway Analysis was used for  
206 network analysis of functional interactions of proteins (Gómez-Molina et al., 2019). The bio-  
207 informatic analysis was done by DAVID Bioinformatics Resources 6.8. pValue was represented as -  
208 Log<sub>10</sub>.

209 **Incubation of target cells with sEVs.** A total of 1000 vesicles was added per cell, and this was  
210 repeated 24 hours later. Then, 48 hours later, the cells were used for the respective assays: MTT (3-  
211 (4,5-Dimethylthiazol-2-yl)-2,5-Diphenyltetrazolium Bromide), DAPI (4',6-diamidino-2-  
212 phenylindole), PI (Propidium iodide) or FUNCAT assay (fluorescence non-canonical amino acid  
213 tagging).

214 **Donor cell treatments.** The culture medium was completely changed to sEV free culture medium  
215 and the following treatments added 1 hour later: 10ng/ml interleukin 1 $\beta$  (IL-1 $\beta$ ), 1 $\mu$ M  
216 Corticosterone (CORT) or 30 $\mu$ M 2-D08 (inhibitor of the enzyme UBC9, SUMO-conjugating enzyme)  
217 or DMSO (as a control). This was repeated 24 and 48 hours later, and the conditioned medium was  
218 collected 72 hours later. The medium was collected to isolate sEVs and the cells were homogenized  
219 and stored at -80°C until further use.

220 **Morphological analysis.** Neurons incubated with astrocyte-derived sEVs obtained in the different  
221 experimental conditions were analyzed using Sholl analysis using plugins from ImageJ software  
222 (National Institute of Health, USA). The dendritic tree was examined in 3  $\mu$ m increments. The  
223 following parameters were obtained: total dendrite length (i.e., the largest radius at which there is  
224 an intersection with a neuronal process) and total number of intersections (i.e., the sum of all  
225 intersections with each different radius) (Luarte et al., 2020).

226 **FUNCAT (fluorescent click chemistry) and immunofluorescence.** To visualize newly synthesized  
227 proteins in cells, the FUNCAT method was used according to Daniela Dieterich (Dieck et al., 2012).  
228 Cultures were incubated with the non-canonical amino-acid AHA (L-azidohomoalaine), which was  
229 incorporated into newly synthesized proteins instead of methionine. As a negative control,  
230 methionine was used. Then, the neurons were fixed and the FUNCAT assay was performed. Briefly,  
231 cells were washed with cold PBS-MC (1 mM MgCl<sub>2</sub>, 0.1 mM CaCl<sub>2</sub> in PBS pH7.4) and directly fixed  
232 with 4% paraformaldehyde for 30 minutes, then washed 3 times with PBS pH 7.4 and incubated with  
233 B-Block solution (10% normal horse serum, 5% sucrose, 2% BSA, 0.2% TritonX-100 in PBS pH 7.4) for  
234 1 hour at room temperature. Cells were newly washed 3 times with PBS pH 7.8 and incubated  
235 overnight with FUNCAT solution (0.2mM Triazole ligand (Tris[(1-benzyl-1H-1,2,3-triazol-4-  
236 yl)methyl]amine), 0.5mM TCEP [Tris-(2-carboxyethyl)phosphine hydrochloride], TAMRA (red-  
237 fluorescent tetramethylrhodamine) Alkyne tag, 40  $\mu$ g/ml CuSO<sub>4</sub> in PBS pH 7.8). The cells were then  
238 washed with PBS pH 7.8 and then with PBS pH 7.4 and incubated with primary antibody in B-block+  
239 0.2% TritonX-100 for 2 hours at room temperature, then were washed with PBS pH 7.4 and  
240 incubated with secondary antibody in B-Block solution for 1 hour at room temperature. Finally, the  
241 cells were incubated for 10 min with 300mM DAPI in PBS 7.4, washed with PBS pH 7.4 and mounted  
242 using MOWIOL mounting media. The images were taken with a confocal LSM 800 Zeiss microscope.  
243 The FUNCAT signal was visualized as a fire lookup table, to visually favor the range of expression of

244 the newly synthesized proteins through a range of colors from blue to white, where blue is the  
245 absence of new protein synthesis.

246 **Statistical analysis.** One-way ANOVA were performed followed by a post-hoc Tukey test using  
247 GraphPad Prism version 5 for Windows, GraphPad Software, La Jolla California USA.

248

## 249 **RESULTS**

### 250 **SUMOylation in astrocytes leads to a differential cargo in the derived sEVs**

251 Our initial studies were to characterize the vesicles obtained by two methods of sEV purification,  
252 the ultracentrifugation method (UC) and a commercial vesicle isolation kit (IK). Both methods  
253 produce samples with a similar protein pattern observed in the Coomassie staining. Western blots  
254 revealed that the sEV marker protein Alix was enriched in the vesicles compared to the donor  
255 astrocytes using both methods. Flotillin in turn was present, but not enriched, while a protein that  
256 is not contained in sEVs, GM130, was not detected in the sEV fraction (Figure 1A). Using either  
257 method nanoparticle tracking analysis (NTA) showed a similar particle size profile obtaining a mean  
258 of 152 nm in the case of UC (Figure 1B) and of 156 nm after using the IK (Figure 1C) in the sEV  
259 fractions isolated.

260 To evaluate the consequences of SUMOylation on the protein content of astrocyte-derived sEVs,  
261 transfections of astrocytes with HIS-SUMO-1 (S1) or HIS-SUMO-2 (S2) were carried out, using GFP  
262 as a transfection control. We obtained a transfection efficiency of 10-15% by lipofection, evaluated  
263 by the detection of GFP-positive cells (data not shown). SUMO conjugation in astrocytes was  
264 evaluated by Western blot (Supplementary figure 1A), and in both cases a slightly increased  
265 SUMOylation was observed, but do not significant (Supplementary figure 1B and 1C). The UC  
266 derived sEVs were subjected to Coomassie staining (Figure 2A) and analyzed by NTA (Figures 2B and  
267 2C). No differences were found in the mean size and sEV yield. At that time, the protein content  
268 (in ng) per vesicle was calculated (Figure 2D), and an increase in the protein load in S2 astrocyte-  
269 derived sEVs was found. Then, sEV proteins were identified by mass spectrometry (Figure 3 and  
270 Supplementary table 1). The Venn and subsequent GO analysis using the DAVID database indicate  
271 that the 512 common proteins were significantly enriched in classical exosome components (Figure  
272 3A), confirming that the analyzed fractions are enriched in sEVs (data not shown). When exclusive  
273 proteins among conditions were compared, an enrichment in biological processes such as  
274 transcription and cell division were found in S1 and S2 sEVs (Figure 3B). To directly identify  
275 SUMOylated proteins, we performed a pulldown (PD) of astrocyte-derived sEVs with SIM-HALO  
276 resins. Proteins contained in the sEVs (input) and proteins bound to SIM resin were shown by  
277 Coomassie staining (Figure 3C). A prominent band was observed over 26kDa in pulled down samples  
278 (SIM-bound). In the samples that did not bind to SIM-beads, a banding pattern similar to the input  
279 was found at high molecular weights. The samples obtained in the PD were analyzed by mass  
280 spectrometry (Supplementary table 1) and we identified an enrichment in biological processes such  
281 as Chromatin organization, mRNA processing and cell division (Figure 3D).

282 Next, a metabolism-related protein ALDOLASE A, (ALDOA) and protein synthesis implicated protein  
283 Eukaryotic elongation factor 2 (EEF-2) were validated by Western blot. Equal amounts of protein  
284 were loaded per lane in the case of cell samples, while an equal number of vesicles was used in the

285 case of sEV samples. (Supplementary figure 2A). ALDOA in cell samples was found with a molecular  
286 weight of ~36kDa, corresponding to the predicted molecular weight interestingly. In sEVs, ALDOA  
287 was observed at ~55kDa, corresponding to possible SUMOylated form(s), in S1 and S2-derived sEVs  
288 (Supplementary figure 2C). Another band is observed at a weight greater than 250 kDa, which could  
289 be compatible with a polySUMOylated form of ALDOA. This form is consistently elevated in sEVs  
290 from S1 astrocytes (Supplementary figure 2B). In turn, EEF-2 was detected at the predicted  
291 molecular weight. This protein tends to have a higher content in sEVs from S1 astrocytes  
292 (Supplementary figure 2D).

### 293 **Modulation of SUMOylation in astrocytes and-derived sEVs under pathophysiologic-like** 294 **conditions**

295 In order to change the environmental conditions of sEV donor cells, astrocytes were incubated  
296 either with IL-1 $\beta$ , a powerful pro-inflammatory cytokine reported to stimulate SUMOylation  
297 (Hajmler et al., 2014; Miranda, Loeser, & Yammani, 2010), or with corticosterone as an *in vitro* stress  
298 model, because stress *in vivo* enhances levels of SUMOylated proteins in sEVs (Gómez-Molina et  
299 al., 2019). In the opposing direction, SUMOylation was inhibited with 2-D08, an inhibitor of the  
300 enzyme E2 (Ubc9) (Kim, Keyser, & Schneekloth, 2014).

301 Astrocytes were treated one time per day for 3 days with 10ng/ml IL-1 $\beta$ , 1 $\mu$ M Corticosterone  
302 (CORT), 30 $\mu$ M 2-D08 or DMSO as control. We first analyzed the SUMOylation pattern of proteins by  
303 Western blot (Figure 4A). Quantification showed that corticosterone increased the conjugation of  
304 proteins with SUMO-2, while 2-D08 decreased protein conjugation with SUMO-1 and SUMO-2  
305 (Figure 4B and C). To check whether astrocytes were affected after the treatments, the astrocyte  
306 marker protein glial fibrillary acid protein (GFAP) was detected in these cultures: 2-D08 decreased  
307 GFAP immunoreactivity, and a recovery of its levels was obtained after corticosterone plus 2-D08  
308 (Figure 4D and E).

309 Then, we studied the possible effects of these sEVs, isolated by IK, on target cells. First, the same  
310 number of vesicles were loaded in each lane of an SDS-PAGE gel to observe the general protein  
311 pattern (Figure 5A). As confirmed later, the 2 D08-derived sEVs contained less proteins. There were  
312 no differences in the average size of the vesicles derived from the three experimental conditions, as  
313 revealed by NTA (Figure 5B). Subsequently, the number of vesicles released per one million cells  
314 was quantified. The total number of cells was quantified at the time of sEV collection (Figure 5C). A  
315 strong increase of sEVs released from cells treated with 2-D08 was observed, while a decrease in  
316 the amount of proteins contained per sEV was observed after 2-D08 treatment (Figure 5D). This  
317 result is compatible with the previous Coomassie staining. Interestingly, in HeLa cells a similar effect  
318 of 2-D08 was found (Supplementary figure 3).

### 319 **Effect of astrocyte-derived sEVs on protein synthesis in neurons**

320 We next identified the sEV protein content by mass spectrometry derived from control,  
321 corticosterone or 2-D08 treated astrocytes (Figure 6A and Supplementary table 3). In total, 149  
322 exclusive proteins were identified in sEVs from corticosterone treated astrocytes. Of these, 19 were  
323 related with protein synthesis (Table 1). Comparing protein synthesis-related hits (biological  
324 processes) among conditions, an enrichment in rRNA transcription and transcription by RNA  
325 polymerase I was found in sEVs from corticosterone-treated astrocytes. Then, we could predict  
326 possible SUMOylation sites in 15 of these proteins using the GPS-SUMO database (Zhao et al., 2014).



327 Due to the large representation of protein synthesis regulatory proteins in sEVs after corticosterone  
328 treatment, we decided to study whether astrocyte-derived sEVs could modulate protein synthesis  
329 in target cells, i.e. in neurons. It was previously shown that astrocyte sEVs can be taken up by  
330 neurons (Luarte et al., 2020). Moreover, the relationship between SUMOylation and gene  
331 expression or transcription regulation has been described extensively (Liu & Shuai, 2008; Müller,  
332 Ledl, & Schmidt, 2004; Rosonina, Akhter, Dou, Babu, & Sri Theivakadadcham, 2017), as well as its  
333 relationship with protein translation (Hendriks & Vertegaal, 2016; Nie, Xie, Loo, & Courey, 2009; X.  
334 Xu, Vatsyayan, Gao, Bakkenist, & Hu, 2010).

335 Mature cortical neurons (21DIV) were incubated with sEVs derived from astrocytes treated with  
336 DMSO as a control, 2-D08 or CORT. To visualize the neurites of neurons in culture,  
337 immunofluorescence using a MAP2 antibody was performed and Sholl analysis was made to  
338 quantify dendritic arborization parameters (Figure 7A). We did not observe significant differences  
339 in the total dendrite length (Figure 7B). When analyzing the total number of intersections of  
340 dendritic branches (i.e. reflecting the dendritic arbor complexity), we found that neurons incubated  
341 with sEVs of control astrocytes presented a significant decrease compared to neurons that were not  
342 incubated with sEVs. This negative regulation is compatible with our previous results using 3 to 6  
343 DIV neurons and suggest that astrocyte sEVs are implicated in dendritic pruning and/or in decreased  
344 growth (Figure 7C). Interestingly, an increase in the synthesis of new proteins in the soma of neurons  
345 incubated with sEVs derived from CORT-treated astrocytes was observed (Figure 7D and 7E). We  
346 observed no changes in the FUNCAT signal in neurons incubated with control astrocyte sEVs or with  
347 sEVs from astrocytes treated with the SUMOylation inhibitor (2-D08), compared with the signal in  
348 untreated neurons. This confirms that sEVs derived from corticosterone-treated astrocytes contain  
349 an increased number or level of proteins involved in the stimulation of protein synthesis.

## 350 **DISCUSSION**

351 In recent years, sEVs have acquired an important place in the sights of many researchers in the area  
352 of neuroscience, due to the fact that they are secreted by most cells, can modulate target cell  
353 function (such as neuronal function), are present in the cerebrospinal fluid, and cross the blood  
354 brain barrier (Gómez-Molina et al., 2019; Liu et al., 2019). The presence of circulating sEVs in body  
355 fluids has opened the possibility that their molecular content could be used as a non-invasive  
356 diagnostic strategy to obtain biomarkers of physiological and pathological situations (Lin et al., 2015;  
357 Saeedi, Israel, Nagy, & Turecki, 2019; Zhang et al., 2019). Given the outstanding characteristics of  
358 these vesicles in the biomedical field, it was important for us to better understand the enigmatic  
359 mechanism of cargo biomolecule determination in them. Literature background led us to propose  
360 that SUMOylation corresponds to an important component that defines the proteins of sEVs.

### 361 **SUMOylation and its effect on astrocytes**

362 In astrocytes, the overexpression of SUMO-1 and SUMO-2 did not substantially increase the levels  
363 of SUMOylation. This may be due to the low levels of transfection that we obtained in astrocytes,  
364 of about 15%. This is consistent with publications that describe the low transfection efficiency of  
365 astrocytes (Alabdullah et al., 2019), but also, that SUMOylation is a transient event that does not  
366 increase steady state levels (Henley, Craig, & Wilkinson, 2014; Klug et al., 2013).

367 In order to complement our observations regarding the role of SUMO overexpression, we used the  
368 SUMOylation inhibitor 2-D08. Other SUMOylation inhibitors such as Ginkgolic acid and Anacardic

369 acid had been previously described (Fukuda et al., 2009), while more recently, the 2-D08 inhibitor  
370 was described (Kim et al., 2014). Several groups have already used this inhibitor to decrease  
371 SUMOylation: for example, in U937 cells, 2-D08 restored the anti-proliferative activity of retinoids  
372 (Baik et al., 2018; Lin et al., 2020; Lorente et al., 2019; Zhou et al., 2019). Accordingly, 2-D08 inhibited  
373 SUMOylation by SUMO-1 or SUMO-2, although both proteins regulate different cellular pathways.  
374 Specific SUMO inhibitors act at the level of non-covalent SIM interactions, thus providing an indirect  
375 inhibition of SUMO-regulated proteins (Hughes et al., 2017).

376 Previously, we had found that in serum sEVs of rats, a possibly SUMOylated form of ALDOC  
377 increased under stress conditions (Gómez-Molina et al., 2019; Ramírez, 2017). The stress response  
378 might be positively associated with this post-translational modification, to trigger the incorporation  
379 of a different set of proteins in sEVs. Thus, we decided to explore the effect of *in vitro* stress on  
380 SUMO levels in our experimental model using corticosterone. Despite observing an increase in  
381 SUMO-2ylation in astrocytes treated with corticosterone, we did not observe a significant increase  
382 in SUMO-1ylation. It would be interesting to explore under other *in vitro* stress conditions such as  
383 oxidative stress, heat stress, hypoxia, starving, or others whether this preference is a general stress  
384 effect. Moreover, these results favor again the idea that SUMO-1 and SUMO-2 protein modifications  
385 exert different biological roles or functions.

#### 386 **SUMOylation and its effect on sEV cargo**

387 The idea that SUMOylation participates in the process of protein loading in sEVs, is supported by  
388 the work showing that hnRNPA2B1 (Villarroya-Beltri et al., 2013) and  $\alpha$ -synuclein (Kunadt et al.,  
389 2015) sorting depend on SUMOylation. Here, we determined that this mechanism broadly affects  
390 the loading of proteins into sEVs both in HeLa cells as well as in astrocytes.

391 Few studies focus on the total protein content in sEVs and/or the number of sEVs released under  
392 different SUMOylation conditions. Ageta described that the ubiquitin-like 3 (UBL3)/membrane-  
393 anchored Ub-fold protein (MUB) UBL3 is necessary for protein sorting in sEVs. In serum sEVs of UBL3  
394 knock-out animals, a strong reduction of the total protein content in vesicles was found when gels  
395 were loaded with the same volume of a rat serum derived sEV suspension (Ageta et al., 2018). In a  
396 different study in cells transfected with siRNAs targeting TSG101 and Hrs, which are proteins of the  
397 ESCRT system, a decrease in the number and the total amount of proteins contained in sEVs was  
398 induced (Smith, Jackson, & Schorey, 2015). However, in this study the number of sEVs were not  
399 related to the parent cell number, which is an important issue to be considered, because the number  
400 of cells can vary according to the treatment.

401 Despite the low levels of SUMO expression in astrocytes, the modification by SUMO-2 caused an  
402 increase in protein content in the derived vesicles. One of the possible explanations for such an  
403 effect is the “SUMO paradox”, in general only a small fraction of the SUMO modified proteins is  
404 detected at a particular time point. However, while SUMO modification is involved in dynamic  
405 processes, many proteins will be modified at a given time. Thus, the enhancement or inhibition of  
406 SUMOylation strongly impacts the biological outcome, this also known as the history of SUMO  
407 modification (Hay, 2005) i.e. in our case, even low levels of SUMOylation is sufficient to influence  
408 protein loading of sEVs (Geiss-Friedlander & Melchior, 2007).

409 We show for the first time that inhibition of SUMOylation using 2-D08 in both astrocytes and HeLa  
410 cells could significantly increase the number of harvested sEVs. The release of other vesicle types,

411 such as of synaptic vesicles, is regulated by SUMOylation (Craig, Anderson, Evans, Girach, & Henley,  
412 2015; Tang, Craig, & Henley, 2015). Interestingly, in pancreatic  $\beta$  cells and synaptic vesicles in  
413 neurons, the SUMOylation of STXBP5 (Tomosyn1A), a protein related with docking and fusion of  
414 vesicles is necessary for its binding with STX1A (Syntaxin-1A) and suppression of exocytosis. In such  
415 a way, inhibition of STXBP5 SUMOylation leads to an increase of exocytosis (Ferdaoussi et al., 2017).  
416 These proteins are also involved in the fusion of MVBs to the plasma membrane to release  
417 intraluminal vesicles (Geerts et al., 2017; Zhang et al., 2006). We thus speculate that SUMOylation  
418 of this protein could also be involved in the endo- exocytosis balance of MVB favoring the exocytosis  
419 when SUMOylation is inhibited.

#### 420 **Identification of sEV proteins derived from cells that over-express SUMO**

421 The SUMOylated proteins contained in sEVs and the biological processes in which these proteins  
422 are involved have been poorly described. We found proteins related to the synthesis of proteins in  
423 sEVs from astrocytes that overexpressed SUMO-1 or SUMO-2. Previously, the relationship of SUMO  
424 with chromosome stabilization, DNA replication, mRNA splicing and transcription and translation in  
425 cells had already been described in cells (Hendriks & Vertegaal, 2016; Nie et al., 2009; X. Xu et al.,  
426 2010). Possibly SUMOylated proteins in astrocyte sEVs were detected after pull downs with SIM  
427 domains. From them, EF-2, a protein related with protein synthesis was enriched in sEVs from S1  
428 and S2 astrocytes, strongly suggesting that SUMOylation is a cellular process that defines EF-2  
429 loading. However, the protein itself is detected at the expected molecular weight and thus, is  
430 unlikely to be SUMOylated, possibly it could be loaded into sEVs by interaction with another  
431 SUMOylated protein that acts as a “carrier”.

432 In turn, ALDOA was a common protein in sEVs from astrocytes related with cellular metabolism. We  
433 detected this protein with high molecular weights in sEVs, 55kDa and over 130kDa. Both molecular  
434 weights could coincide with different SUMOylation forms, the first is a mono-SUMOylation and the  
435 second a polySUMOylation (Pichler et al., 2017). The 130kDa form is mostly detected in sEV of  
436 astrocytes transfected with SUMO-1. It would be interesting to mutate the possible K residues that  
437 are SUMO acceptors to demonstrate that ALDOA loading depends on SUMOylation.

#### 438 **Functional effect of astrocyte-derived sEVs on neurons**

439 When neurons were incubated with control astrocyte sEVs, a decrease of dendritic arbor complexity  
440 was observed. This can be interpreted as increased pruning and thus enhanced network maturation  
441 during this time period or decreased growth (Luarte et al., 2020). Intriguingly, sEVs derived from  
442 corticosterone treated astrocytes did not affect dendritic length or complexity, but stimulated  
443 protein synthesis. The functional roles of the newly synthesized proteins need to be determined in  
444 the future. As the dendritic architecture depends on many different signaling pathways and  
445 molecular mechanisms (Arikkath, 2012; Skelton, Poquerusse, Salinaro, Li, & Luikart, 2020; J. Xu et  
446 al., 2019; Ziegler & Tavasani, 2019). The contribution of specific molecules and proteins contained  
447 in sEVs on it deserves many future studies.

448 The methodology used by us to detect de novo protein synthesis in neurons allows visualization of  
449 newly synthesized proteins with high sensitivity (Dieck et al., 2012). The effect of sEVs on protein  
450 synthesis was abolished when astrocytes had been treated with SUMOylation inhibitor 2-D08,  
451 suggesting that SUMOylation is necessary to load proteins related with protein synthesis in sEVs.  
452 The relationship between SUMOylation and with chromosome stabilization, DNA replication, mRNA

453 splicing and transcription has been widely described in cells (Hendriks & Vertegaal, 2016; Nie et al.,  
454 2009; X. Xu et al., 2010).

455 In summary when astrocytes are under stress, they increase the conjugation of proteins with SUMO-  
456 2 and allow the loading of proteins related to the synthesis of proteins within their sEVs. To confirm  
457 that SUMOylation is necessary for protein loading in sEVs, by inhibiting of SUMOylation with 2-D08  
458 in 2 different cell types (HeLa and astrocytes) protein load per sEV was decreased, confirming the  
459 importance of SUMOylation in protein loading in sEVs. In turn, sEVs can cause changes in target cells  
460 such as neurons by changing dendritic arborization and increasing *de novo* protein synthesis, when  
461 the sEVs are from stressed astrocytes.

462

463 **Funding:** Agencia Nacional de Investigación y Desarrollo (ANID), fellowship: 21150958 (to A.F.) and  
464 Grants, Regular Fondecyt Projects 1140108 and 1200693 (to U.W.). A.F. is thankful to the German  
465 Academic Exchange Service (DAAD) Short-Term Grants (57440917).

466 **Acknowledgments.** We wholeheartedly thank Evelyn Dankert and Soledad Sandoval for her  
467 technical support and Dr. Holly Garringer and Dr. Grace Hallinan for critically reading the  
468 manuscript.

469 **Author Contribution.** AF, AR and UW designed the experiments and wrote the manuscript. AF  
470 prepared all figures of the manuscript. The experimental work was done by: Figure 1, generated by  
471 AF; Figure 2, generated by AF; Figure 3, generated by AF and OS; TK supervised the mass  
472 spectrometry; AF did the bio-informatic analysis. Figure 4, generated by AF and MM; Figure 5,  
473 generated by AF. Figure 6 generated by AF; TK supervised the mass spectrometry; AF did the bio-  
474 informatic analysis. Figure 7 generated by AF; PL supervised the FUNCAT. Supplementary Figure 1  
475 generated by AF. Supplementary Figure 2 generated by AF. Supplementary Figure 3 generated by  
476 AF. KC and TG prepared astrocytes primary cultures in all experiments.

477 **Competing Financial Interests.** All authors declare that they have no conflict of interests

478

479

480 **FIGURE LEGENDS**

481 **Figure 1. Characterization of small Extracellular Vesicles (sEVs) from astrocytes.** A) Coomassie  
482 staining and sEVs-enriched proteins detected by Western blot of sEVs isolated by  
483 Ultracentrifugation (UC) or sEV isolation kit (IK) compared to donor astrocytes (As). B) sEV size  
484 distribution using Nanoparticle Tracking Analysis of sEVs isolated by UC,  $152 \pm 7.8$  nm (mean  $\pm$  SEM).  
485 C) sEV size distribution using sEV IK, mode  $156 \pm 10.7$  nm (mean  $\pm$  SEM). n= 6 sEVs and cell culture  
486 from different murine preparation, 3 technical repeats for each n.

487

488 **Figure 2. Increased protein loading in Small Extracellular Vesicle (sEVs) of SUMO-2 astrocytes.** A)  
489 Coomassie staining of the corresponding sEVs. B) Mean sEV size in nm C) Quantification of the  
490 number of vesicles obtained from the conditioned media of one million cells. D) Quantification of  
491 protein content per sEV. All data are expressed as mean  $\pm$  SEM and for quantification one-way  
492 ANOVA was performed, followed by a post-hoc Tukey test. Statistical significance is represented  
493 with asterisks. n = 7-8, sEVs and cell culture from different murine preparation, 3 technical repeats  
494 for each n. \* $p < 0.05$ .

495

496 **Figure 3. Proteomics of small Extracellular Vesicles (sEVs) from astrocytes expressing SUMO reveal**  
497 **proteins related to transcription, translation and cell division.** A) Venn analysis of sEV proteins from  
498 astrocytes transfected with GFP, SUMO-1 (S1) or SUMO-2 (S2), identified by mass spectrometry. B)  
499 Comparison between biological processes present in exclusive proteins in each sample analyzed by  
500 the DAVID database. C) Coomassie staining of 10% input of astrocyte-derived sEVs bound to SIM-  
501 beads. D) Biological processes present in proteins bound to SIM-beads analyzed by the DAVID  
502 database. Data obtained from n=2-3 6 sEVs from different murine preparation.

503

504 **Figure 4. Treatment with 2-D08 decreases and corticosterone increases SUMOylation in**  
505 **astrocytes.** Astrocytes were treated 3 times with DMSO (control), 10 ng/ml IL-1 $\beta$ , 1 $\mu$ M  
506 corticosterone (CORT) or 30  $\mu$ M 2-D08 (UBC9 inhibitor), in 24-hour intervals. sEVs were prepared  
507 24 hours after the last treatment. A) Detection by Western blot of proteins conjugated with SUMO-  
508 1 or SUMO-2 in treated cells. B) Quantification of protein conjugated with SUMO-1 by densitometry,  
509 expressed as fold change with respect to the control and corrected by the densitometry of  
510 Coomassie staining. C) Quantification of protein conjugated with SUMO-2 in the same conditions.  
511 D) Astrocytes were stained with GFAP antibody (green) and DAPI (blue). E) Quantification of the  
512 intensity of GFAP signal. F) Quantification of astrocyte size. All data are expressed as mean  $\pm$  SEM  
513 and for quantification one-way ANOVA was performed, followed by a post-hoc Tukey test. Statistical  
514 significance is represented with asterisks. n = 5-8, sEVs and cell culture from different murine  
515 preparation, 3 technical repeats for each n. \* $p < 0.05$ ).

516

517 **Figure 5. SUMOylation inhibition prevents, and corticosterone increases protein load in small**  
518 **Extracellular Vesicles (sEVs) from Astrocytes.** Astrocytes were treated 3 times with DMSO (control),  
519 10 ng/ml IL-1 $\beta$ , 1 $\mu$ M corticosterone (CORT) or 30  $\mu$ M 2-D08 (UBC9 inhibitor), in 24-hour intervals.  
520 sEVs were prepared 24 hours after the last treatment. A) Coomassie staining shows the sEV  
521 proteins contained in 10 million sEVs. B) Mean sEV size in nm. C) Number of vesicles released per  
522 million cells. D) Quantification of protein content (in ng) per sEV. All data are expressed as mean  $\pm$   
523 SEM and for quantification one-way ANOVA was performed, followed by a post-hoc Tukey test.  
524 Statistical significance is represented with asterisks (n = 9, sEVs and cell culture from different  
525 murine preparation, 3 technical repeats for each n.\*\*\*p<0.001).

526

527 **Figure 6. Proteomics of small Extracellular Vesicles (sEVs) from astrocyte treated with**  
528 **corticosterone reveals proteins related with protein synthesis.** A) Venn analysis of sEV proteins  
529 from astrocytes treated with DMSO (control), corticosterone (CORT) and SUMO inhibitor (2-D08),  
530 identified by mass spectrometry. B) Comparison between Biological process present in exclusive  
531 proteins in each sample analyzed by the DAVID database. Data obtained from n=4-6 sEVs from  
532 different murine preparation.

533

534 **Figure 7. Neurons with small Extracellular Vesicles (sEVs) from astrocytes treated with**  
535 **corticosterone increase newly synthesized proteins.** Cortical neurons untreated (-sEV) or incubated  
536 with 1000 astrocyte-derived sEVs per neuron (two times in 24 hour intervals). Astrocytes were  
537 previously treated with DMSO (Ctrl As-sEVs), corticosterone (CORT sEVs) and 2-D08 (2-D08 sEVs).  
538 24 hours after the last incubation with sEVs, neurons were incubated with AHA or methionine added  
539 to the culture medium for 3 hours. The FUNCAT assay and MAP2 staining was performed. A) Sholl  
540 Analysis of neurons incubated with astrocyte-derived sEVs. B) Quantification of the total dendrite  
541 length per neuron. C) Quantification of total number of intersections per neuron. D) Neurons were  
542 stained with MAP2 antibody and newly synthesized proteins were detected by the AHA-TAMRA tag.  
543 The intensity of the FUNCAT signal is inserted as a fire lookup table in the right panel. E)  
544 Quantification of the intensity of the FUNCAT signal, TAMRA tagged-newly synthesized proteins  
545 (AHA). All data are expressed as mean  $\pm$  SEM and for quantification one-way ANOVA was performed,  
546 followed by a post-hoc Tukey test. Statistical significance is represented with asterisks (n = 3-7, sEVs  
547 and cell culture from different murine preparation, 20 neurons was quantified by preparations  
548 \*p<0.05).

549

## 550 SUPPLEMENTARY FIGURE LEGENDS

551 **Supplementary figure 1. Transient transfection of SUMO plasmids in primary cultures of**  
552 **astrocytes has no effect on SUMO-1 or SUMO-2 expression.** A) Proteins conjugated with SUMO-1  
553 or SUMO-2 were detected by Western blot in cells transfected with GFP, SUMO-1 (S1) or SUMO-2  
554 (S2). The corresponding Coomassie staining is shown. B) Quantification of the proteins conjugated

555 with SUMO-1 or C) SUMO-2 expressed as fold change with respect to the control (GFP). All data are  
556 expressed as mean  $\pm$  SEM and for quantification one-way ANOVA was performed, followed by a  
557 post-hoc Tukey test. n=3, cell culture from different murine preparation.

558

559 **Supplementary figure 2. ALDOA and EF-2 are contained in astrocyte-derived small Extracellular**  
560 **Vesicles (sEVs).** A) ALDOA, EF-2 and FLOT1 were detected by Western blot in sEVs from astrocytes  
561 transfected with GFP, SUMO-1 (S1) or SUMO-2 (S2). The same number of sEVs was loaded per lane.  
562 B) Quantification of ALDOA 55kDa double band in sEVs. C) Quantification of ALDOA 250kDa form.  
563 D) EEF-2 in astrocyte-derived sEVs. Fold change with respect to control (GFP). All data are expressed  
564 as mean  $\pm$  SEM and for quantification one-way ANOVA was performed, followed by a post-hoc Tukey  
565 test. Statistical significance is represented with asterisks (n = 3, sEVs and cell culture from different  
566 murine preparation. \*p<0.05).

567

568 **Supplementary figure 3. SUMOylation inhibition prevents proteins loading in small Extracellular**  
569 **Vesicles (sEVs) of HeLa cells.** Cells were treated 3 times with DMSO (control), 10 ng/ml IL-1 $\beta$ , 1 $\mu$ M  
570 corticosterone (CORT) or 30  $\mu$ M 2-D08 (UBC9 inhibitor), in 24-hour intervals. sEVs were prepared  
571 24 hours after the last treatment. A) Coomassie staining shows the sEV proteins contained in 10  
572 million sEVs. B) Mean sEV size in nm. C) Number of vesicles released per million cells. D)  
573 Quantification of protein content (in ng) per sEV. All data are expressed as mean  $\pm$  SEM and for  
574 quantification one-way ANOVA was performed, followed by a post-hoc Tukey test. Statistical  
575 significance is represented with asterisks (n = 9, sEVs and cell culture from different murine  
576 preparation, 3 technical repeats for each n. \*p<0.05, \*\*\*\*p<0.001).

577

## 578 TABLE LEGEND

579 **Table 1. List of the proteins involved in protein synthesis in sEVs derived from astrocytes treated**  
580 **with corticosterone (CORT).** K (Lysine) is a possible site of SUMOylation. Data obtained from n=4-6  
581 biological repeats.

582

## 583 SUPPLEMENTARY TABLE LEGENDS

584 **Supplementary Table 1:** List of proteins from astrocyte-derived sEVs. The columns contain the  
585 protein name, the Uniprot ID and in the following columns, the number of times that each protein  
586 was detected in sEVs samples from astrocytes transfected with GFP, SUMO-1 (S1) or SUMO-2 (S2).  
587 n=2 determinations for each case. Mass spectrometry was performed in Otto von Guericke  
588 University Magdeburg, Germany.

589 **Supplementary Table 2:** List of proteins pulled down with SIM beads from astrocyte-derived sEVs.  
590 The columns contain the protein name, the Uniprot ID and in the following columns, the number of  
591 times that each protein was detected in the starting material (input) and in the corresponding pull

592 downs (PD) from astrocyte-derived sEVs. n=3 determinations for each case. Mass spectrometry was  
593 performed in Otto von Guericke University Magdeburg, Germany.

594 **Supplementary Table 3:** List of proteins from astrocyte-derived sEVs. The columns contain the  
595 protein name, the Uniprot ID and in the following columns, the number of times that each protein  
596 was detected in sEVs samples from astrocytes treated with DMSO (control), corticosterone (CORT)  
597 or 2-D08 (SUMOylation inhibitor). n=4-6 determinations for each case. Mass spectrometry was  
598 performed in Otto von Guericke University Magdeburg, Germany.

599



## 600 REFERENCES

- 601 Ageta, H., Ageta-Ishihara, N., Hitachi, K., Karayel, O., Onouchi, T., Yamaguchi, H., ... Tsuchida, K. (2018). UBL3  
602 modification influences protein sorting to small extracellular vesicles. *Nature Communications*, *9*(1).  
603 <https://doi.org/10.1038/s41467-018-06197-y>
- 604 Ageta, H., & Tsuchida, K. (2019, December 1). Post-translational modification and protein sorting to small extracellular  
605 vesicles including exosomes by ubiquitin and UBLs. *Cellular and Molecular Life Sciences*, Vol. 76, pp. 4829–4848.  
606 <https://doi.org/10.1007/s00018-019-03246-7>
- 607 Alabdullah, A. A., Al-Abdulaziz, B., Alsalem, H., Magrashi, A., Pulicat, S. M., Almrzoua, A. A., ... Al-Mubarak, B. R. (2019).  
608 Estimating transfection efficiency in differentiated and undifferentiated neural cells. *BMC Research Notes*, *12*(1),  
609 225. <https://doi.org/10.1186/s13104-019-4249-5>
- 610 Arikath, J. (2012, December 8). Molecular mechanisms of dendrite morphogenesis. *Frontiers in Cellular Neuroscience*.  
611 <https://doi.org/10.3389/fncel.2012.00061>
- 612 Baik, H., Boulanger, M., Hosseini, M., Kowalczyk, J., Zaghdoudi, S., Salem, T., ... Bossis, G. (2018). Targeting the sumo  
613 pathway primes all-trans retinoic acid-induced differentiation of nonpromyelocytic acute myeloid leukemias.  
614 *Cancer Research*, *78*(10), 2601–2613. <https://doi.org/10.1158/0008-5472.CAN-17-3361>
- 615 Colombo, M., Raposo, G., & Théry, C. (2014). Biogenesis, Secretion, and Intercellular Interactions of Exosomes and Other  
616 Extracellular Vesicles. *Annual Review of Cell and Developmental Biology*, *30*(1), 255–289.  
617 <https://doi.org/10.1146/annurev-cellbio-101512-122326>
- 618 Craig, T. J., Anderson, D., Evans, A. J., Girach, F., & Henley, J. M. (2015). SUMOylation of Syntaxin1A regulates  
619 presynaptic endocytosis. *Scientific Reports*, *5*, 17669. <https://doi.org/10.1038/srep17669>
- 620 Desterro, J. M. P., Rodriguez, M. S., Kemp, G. D., & Ronald T, H. (1999). Identification of the enzyme required for  
621 activation of the small ubiquitin-like protein SUMO-1. *Journal of Biological Chemistry*, *274*(15), 10618–10624.  
622 <https://doi.org/10.1074/jbc.274.15.10618>
- 623 Desterro, J. M., Thomson, J., & Hay, R. T. (1997). Ubch9 conjugates SUMO but not ubiquitin. *FEBS Letters*, *417*(3), 297–  
624 300. Retrieved from <http://www.ncbi.nlm.nih.gov/pubmed/9409737>
- 625 Dieck, S. T., Müller, A., Nehring, A., Hinz, F. I., Bartnik, I., Schuman, E. M., & Dieterich, D. C. (2012). Metabolic labeling  
626 with noncanonical amino acids and visualization by chemoselective fluorescent tagging. *Current Protocols in Cell*  
627 *Biology*, *1*(SUPPL.56). <https://doi.org/10.1002/0471143030.cb0711s56>
- 628 Doyle, L., & Wang, M. (2019). Overview of Extracellular Vesicles, Their Origin, Composition, Purpose, and Methods for  
629 Exosome Isolation and Analysis. *Cells*, *8*(7), 727. <https://doi.org/10.3390/cells8070727>
- 630 Ferdaoussi, M., Fu, J., Dai, X., Manning Fox, J. E., Suzuki, K., Smith, N., ... MacDonald, P. E. (2017). SUMOylation and  
631 calcium control syntaxin-1A and secretogin sequestration by tomosyn to regulate insulin exocytosis in human  $\beta$   
632 cells. *Scientific Reports*, *7*(1). <https://doi.org/10.1038/s41598-017-00344-z>
- 633 Fukuda, I., Ito, A., Hirai, G., Nishimura, S., Kawasaki, H., Saitoh, H., ... Yoshida, M. (2009). Ginkgolic Acid Inhibits Protein  
634 SUMOylation by Blocking Formation of the E1-SUMO Intermediate. *Chemistry and Biology*, *16*(2), 133–140.  
635 <https://doi.org/10.1016/j.chembiol.2009.01.009>
- 636 Geerts, C. J., Mancini, R., Chen, N., Koopmans, F. T. W., Li, K. W., Smit, A. B., ... Groffen, A. J. A. (2017). Tomosyn  
637 associates with secretory vesicles in neurons through its N- and C-terminal domains. *PLOS ONE*, *12*(7), e0180912.  
638 <https://doi.org/10.1371/journal.pone.0180912>
- 639 Geiss-Friedlander, R., & Melchior, F. (2007, December). Concepts in sumoylation: A decade on. *Nature Reviews*  
640 *Molecular Cell Biology*, Vol. 8, pp. 947–956. <https://doi.org/10.1038/nrm2293>
- 641 Gómez-Molina, C., Sandoval, M., Henzi, R., Ramírez, J. P., Varas-Godoy, M., Luarte, A., ... Wyneken, U. (2019). Small  
642 Extracellular Vesicles in Rat Serum Contain Astrocyte-Derived Protein Biomarkers of Repetitive Stress. *The*  
643 *International Journal of Neuropsychopharmacology*, *22*(3), 232–246. <https://doi.org/10.1093/ijnp/pyy098>
- 644 Hajmrle, C., Ferdaoussi, M., Plummer, G., Spigelman, A. F., Lai, K., Manning Fox, J. E., & MacDonald, P. E. (2014).  
645 SUMOylation protects against IL-1 $\beta$ -induced apoptosis in INS-1 832/13 cells and human islets. *American Journal of*

- 646 *Physiology. Endocrinology and Metabolism*, 307(8), E664-73. <https://doi.org/10.1152/ajpendo.00168.2014>
- 647 Hay, R. T. (2005, April 1). SUMO: A history of modification. *Molecular Cell*, Vol. 18, pp. 1–12.  
648 <https://doi.org/10.1016/j.molcel.2005.03.012>
- 649 Hecker, C. M., Rabiller, M., Haglund, K., Bayer, P., & Dikic, I. (2006). Specification of SUMO1- and SUMO2-interacting  
650 motifs. *Journal of Biological Chemistry*, 281(23), 16117–16127. <https://doi.org/10.1074/jbc.M512757200>
- 651 Hendriks, I. A., & Vertegaal, A. C. O. (2016). A comprehensive compilation of SUMO proteomics. *Nature Reviews*  
652 *Molecular Cell Biology*, 17(9), 581–595. <https://doi.org/10.1038/nrm.2016.81>
- 653 Henley, J. M., Craig, T. J., & Wilkinson, K. A. (2014, October 1). Neuronal SUMOylation: mechanisms, physiology, and  
654 roles in neuronal dysfunction. *Physiological Reviews*, Vol. 94, pp. 1249–1285.  
655 <https://doi.org/10.1152/physrev.00008.2014>
- 656 Holopainen, J. M., Angelova, M. I., & Kinnunen, P. K. (2000). Vectorial budding of vesicles by asymmetrical enzymatic  
657 formation of ceramide in giant liposomes. *Biophysical Journal*, 78(2), 830–838. [https://doi.org/10.1016/S0006-3495\(00\)76640-9](https://doi.org/10.1016/S0006-3495(00)76640-9)
- 659 Hughes, D. J., Tiede, C., Penswick, N., Tang, A. A. S., Trinh, C. H., Mandal, U., ... Whitehouse, A. (2017). Generation of  
660 specific inhibitors of SUMO-1- and SUMO-2/3-mediated protein-protein interactions using Affimer (Adhiron)  
661 technology. *Science Signaling*, 10(505). <https://doi.org/10.1126/scisignal.aaj2005>
- 662 Isola, A., & Chen, S. (2016). Exosomes: The Messengers of Health and Disease. *Current Neuropharmacology*, 15(1), 157–  
663 165. <https://doi.org/10.2174/1570159x14666160825160421>
- 664 Jeppesen, D. K., Fenix, A. M., Franklin, J. L., Higginbotham, J. N., Zhang, Q., Zimmerman, L. J., ... Coffey, R. J. (2019).  
665 Reassessment of Exosome Composition. *Cell*, 177(2), 428-445.e18. <https://doi.org/10.1016/j.cell.2019.02.029>
- 666 Johnson, E. S., & Blobel, G. (1997). Ubc9p is the conjugating enzyme for the ubiquitin-like protein Smt3p. *The Journal of*  
667 *Biological Chemistry*, 272(43), 26799–26802. Retrieved from <http://www.ncbi.nlm.nih.gov/pubmed/9341106>
- 668 Kalluri, R., & LeBleu, V. S. (2020, February 7). The biology, function, and biomedical applications of exosomes. *Science*,  
669 Vol. 367. <https://doi.org/10.1126/science.aau6977>
- 670 Khan, F. A., Pandupuspitasari, N. S., Huang, C. J., Hao, X., & Zhang, S. (2016). SUMOylation: A link to future therapeutics.  
671 *Current Issues in Molecular Biology*, 18(1), 49–56. <https://doi.org/v18/49> [pii]
- 672 Kim, Keyser, S., & Schneekloth, J. (2014). Synthesis of 2',3',4'-trihydroxyflavone (2-D08), an inhibitor of protein  
673 sumoylation. *Bioorganic and Medicinal Chemistry Letters*, 24(4), 1094–1097.  
674 <https://doi.org/10.1016/j.bmcl.2014.01.010>
- 675 Klug, H., Xaver, M., Chaugule, V. K., Koidl, S., Mittler, G., Klein, F., & Pichler, A. (2013). Ubc9 Sumoylation Controls SUMO  
676 Chain Formation and Meiotic Synapsis in *Saccharomyces cerevisiae*. *Molecular Cell*, 50, 625–636.  
677 <https://doi.org/10.1016/j.molcel.2013.03.027>
- 678 Kowal, J., Arras, G., Colombo, M., Jouve, M., Morath, J. P., Primdal-Bengtson, B., ... Théry, C. (2016). Proteomic  
679 comparison defines novel markers to characterize heterogeneous populations of extracellular vesicle subtypes.  
680 *Proceedings of the National Academy of Sciences of the United States of America*, 113(8), E968-77.  
681 <https://doi.org/10.1073/pnas.1521230113>
- 682 Kunadt, M., Eckermann, K., Stuenkel, A., Gong, J., Russo, B., Strauss, K., ... Schneider, A. (2015). Extracellular vesicle  
683 sorting of  $\alpha$ -Synuclein is regulated by sumoylation. *Acta Neuropathologica*, 129(5), 695–713.  
684 <https://doi.org/10.1007/s00401-015-1408-1>
- 685 Liang, Y. C., Lee, C. C., Yao, Y. L., Lai, C. C., Schmitz, M. L., & Yang, W. M. (2016). SUMO5, a novel poly-SUMO isoform,  
686 regulates PML nuclear bodies. *Scientific Reports*, 6. <https://doi.org/10.1038/srep26509>
- 687 Lin, J., Li, J., Huang, B., Liu, J., Chen, X., Chen, X. M., ... Wang, X. Z. (2015). Exosomes: Novel Biomarkers for Clinical  
688 Diagnosis. *Scientific World Journal*, 2015. <https://doi.org/10.1155/2015/657086>
- 689 Lin, Wang, Y., Jiang, Y., Xu, M., Pang, Q., Sun, J., ... Xu, J. (2020). Sumoylation enhances the activity of the TGF- $\beta$ /SMAD  
690 and HIF-1 signaling pathways in keloids. *Life Sciences*, 255. <https://doi.org/10.1016/j.lfs.2020.117859>

- 691 Liu, B., & Shuai, K. (2008, June). Regulation of the sumoylation system in gene expression. *Current Opinion in Cell*  
692 *Biology*, Vol. 20, pp. 288–293. <https://doi.org/10.1016/j.ceb.2008.03.014>
- 693 Liu, Bai, X., Zhang, A., Huang, J., Xu, S., & Zhang, J. Role of Exosomes in Central Nervous System Diseases. , 12 *Frontiers in*  
694 *Molecular Neuroscience* § (2019).
- 695 Lorente, M., García-Casas, A., Salvador, N., Martínez-López, A., Gabicagogeascoa, E., Velasco, G., ... Castillo-Lluva, S.  
696 (2019). Inhibiting SUMO1-mediated SUMOylation induces autophagy-mediated cancer cell death and reduces  
697 tumour cell invasion via RAC1. *Journal of Cell Science*, 132(20). <https://doi.org/10.1242/jcs.234120>
- 698 Luarte, A., Henzi, R., Fernández, A., Gaete, D., Cisternas, P., Pizarro, M., ... Wyneken, U. (2020). Astrocyte-Derived Small  
699 Extracellular Vesicles Regulate Dendritic Complexity through miR-26a-5p Activity. *Cells*, 9(4).  
700 <https://doi.org/10.3390/cells9040930>
- 701 Mathieu, M., Martin-Jaular, L., Lavieu, G., & Théry, C. (2019, January 1). Specificities of secretion and uptake of  
702 exosomes and other extracellular vesicles for cell-to-cell communication. *Nature Cell Biology*, Vol. 21, pp. 9–17.  
703 <https://doi.org/10.1038/s41556-018-0250-9>
- 704 Melchior, F. (2000). SUMO—Nonclassical Ubiquitin. *Annual Review of Cell and Developmental Biology*, 16(1), 591–626.  
705 <https://doi.org/10.1146/annurev.cellbio.16.1.591>
- 706 Miranda, K. J., Loeser, R. F., & Yammani, R. R. (2010). Sumoylation and nuclear translocation of S100A4 regulate IL-1β-  
707 mediated production of matrix metalloproteinase-13. *Journal of Biological Chemistry*, 285(41), 31517–31524.  
708 <https://doi.org/10.1074/jbc.M110.125898>
- 709 Müller, S., Ledl, A., & Schmidt, D. (2004, March 15). SUMO: A regulator of gene expression and genome integrity.  
710 *Oncogene*, Vol. 23, pp. 1998–2008. <https://doi.org/10.1038/sj.onc.1207415>
- 711 Nie, M., Xie, Y., Loo, J. A., & Courey, A. J. (2009). Genetic and proteomic evidence for roles of Drosophila SUMO in cell  
712 cycle control, Ras signaling, and early pattern formation. *PLoS ONE*, 4(6).  
713 <https://doi.org/10.1371/journal.pone.0005905>
- 714 Pichler, A., Fatouros, C., Lee, H., & Eisenhardt, N. (2017). SUMO conjugation – a mechanistic view. *Biomolecular*  
715 *Concepts*, 8(1), 13–36. <https://doi.org/10.1515/bmc-2016-0030>
- 716 Ramírez, J. P. (2017). *Vesículas extracelulares derivadas de astrocitos y su contenido de miRNAs son biomarcadores de*  
717 *estrés en la circulación periférica e interactúan con el epitelio intestinal. Thesis Magister. Universidad de los*  
718 *Andes.*
- 719 Rosonina, E., Akhter, A., Dou, Y., Babu, J., & Sri Theivakadacham, V. S. (2017, August 8). Regulation of transcription  
720 factors by sumoylation. *Transcription*, Vol. 8, pp. 220–231. <https://doi.org/10.1080/21541264.2017.1311829>
- 721 Saeedi, S., Israel, S., Nagy, C., & Turecki, G. (2019, December 1). The emerging role of exosomes in mental disorders.  
722 *Translational Psychiatry*, Vol. 9. <https://doi.org/10.1038/s41398-019-0459-9>
- 723 Simons, M., & Raposo, G. (2009). Exosomes – vesicular carriers for intercellular communication. *Current Opinion in Cell*  
724 *Biology*, 21(4), 575–581. <https://doi.org/10.1016/j.ceb.2009.03.007>
- 725 Skelton, P. D., Poquerusse, J., Salinaro, J. R., Li, M., & Luikart, B. W. (2020). Activity-dependent dendritic elaboration  
726 requires Pten. *Neurobiology of Disease*, 134, 104703. <https://doi.org/10.1016/j.nbd.2019.104703>
- 727 Smith, Jackson, L., & Schorey, J. S. (2015). Ubiquitination as a Mechanism To Transport Soluble Mycobacterial and  
728 Eukaryotic Proteins to Exosomes. *The Journal of Immunology*, 195(6), 2722–2730.  
729 <https://doi.org/10.4049/jimmunol.1403186>
- 730 Smith, P. K., Krohn, R. I., Hermanson, G. T., Mallia, A. K., Gartner, F. H., Provenzano, M. D., ... Klenk, D. C. (1985).  
731 Measurement of protein using bicinchoninic acid. *Analytical Biochemistry*, 150(1), 76–85.  
732 [https://doi.org/10.1016/0003-2697\(85\)90442-7](https://doi.org/10.1016/0003-2697(85)90442-7)
- 733 Song, J., Durrin, L. K., Wilkinson, T. A., Krontiris, T. G., & Chen, Y. (2004). Identification of a SUMO-binding motif that  
734 recognizes SUMO-modified proteins. *Proceedings of the National Academy of Sciences of the United States of*  
735 *America*, 101(40), 14373–14378. <https://doi.org/10.1073/pnas.0403498101>
- 736 Tang, L. T. H., Craig, T. J., & Henley, J. M. (2015). SUMOylation of synapsin Ia maintains synaptic vesicle availability and is

- 737 reduced in an autism mutation. *Nature Communications*, 6. <https://doi.org/10.1038/ncomms8728>
- 738 Théry, C., Amigorena, S., Raposo, G., & Clayton, A. (2006). Isolation and Characterization of Exosomes from Cell Culture  
739 Supernatants and Biological Fluids. *Current Protocols in Cell Biology*, 30(1), 3.22.1-3.22.29.  
740 <https://doi.org/10.1002/0471143030.cb0322s30>
- 741 Van Niel, G., D'Angelo, G., & Raposo, G. (2018, April 1). Shedding light on the cell biology of extracellular vesicles. *Nature*  
742 *Reviews Molecular Cell Biology*, Vol. 19, pp. 213–228. <https://doi.org/10.1038/nrm.2017.125>
- 743 Villarroya-Beltri, C., Gutiérrez-Vázquez, C., Sánchez-Cabo, F., Pérez-Hernández, D., Vázquez, J., Martín-Cofreces, N., ...  
744 Sánchez-Madrid, F. (2013). Sumoylated hnRNP A2B1 controls the sorting of miRNAs into exosomes through  
745 binding to specific motifs. *Nature Communications*, 4, 2980. <https://doi.org/10.1038/ncomms3980>
- 746 Witwer, K. W., & Théry, C. (2019). Extracellular vesicles or exosomes? On primacy, precision, and popularity influencing a  
747 choice of nomenclature. *Journal of Extracellular Vesicles*, 8(1), 1648167.  
748 <https://doi.org/10.1080/20013078.2019.1648167>
- 749 Xu, J., Du, Y. L., Xu, J. W., Hu, X. G., Gu, L. F., Li, X. M., ... Xu, J. (2019). Neuroligin 3 Regulates Dendritic Outgrowth by  
750 Modulating Akt/mTOR Signaling. *Frontiers in Cellular Neuroscience*, 13, 518.  
751 <https://doi.org/10.3389/fncel.2019.00518>
- 752 Xu, X., Vatsyayan, J., Gao, C., Bakkenist, C. J., & Hu, J. (2010). Sumoylation of eIF4E activates mRNA translation. *EMBO*  
753 *Reports*, 11(4), 299–304. <https://doi.org/10.1038/embor.2010.18>
- 754 Zhang, Liu, Y., Liu, H., & Tang, W. H. (2019, February 15). Exosomes: Biogenesis, biologic function and clinical potential.  
755 *Cell and Bioscience*, Vol. 9. <https://doi.org/10.1186/s13578-019-0282-2>
- 756 Zhang, W., Lilja, L., Mandic, S. A., Gromada, J., Smidt, K., Janson, J., ... Meister, B. (2006). Tomosyn Is Expressed in  $\beta$ -Cells  
757 and Negatively Regulates Insulin Exocytosis. *Diabetes*, 55(3), 574–581.  
758 <https://doi.org/10.2337/diabetes.55.03.06.db05-0015>
- 759 Zhao, Q., Xie, Y., Zheng, Y., Jiang, S., Liu, W., Mu, W., ... Ren, J. (2014). GPS-SUMO: A tool for the prediction of  
760 sumoylation sites and SUMO-interaction motifs. *Nucleic Acids Research*, 42(W1).  
761 <https://doi.org/10.1093/nar/gku383>
- 762 Zhou, P., Chen, X., Li, M., Tan, J., Zhang, Y., Yuan, W., ... Wang, G. (2019). 2-D08 as a SUMOylation inhibitor induced ROS  
763 accumulation mediates apoptosis of acute myeloid leukemia cells possibly through the deSUMOylation of NOX2.  
764 *Biochemical and Biophysical Research Communications*, 513(4), 1063–1069.  
765 <https://doi.org/10.1016/j.bbrc.2019.04.079>
- 766 Ziegler, A. B., & Tavosanis, G. (2019, July 1). Glycerophospholipids – Emerging players in neuronal dendrite branching  
767 and outgrowth. *Developmental Biology*, Vol. 451, pp. 25–34. <https://doi.org/10.1016/j.ydbio.2018.12.009>
- 768
- 769
- 770
- 771
- 772
- 773
- 774
- 775
- 776

**A)**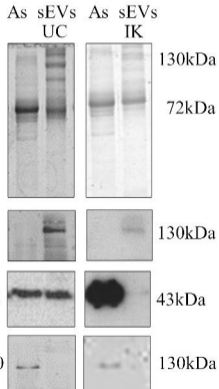**B)**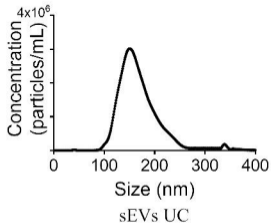**C)**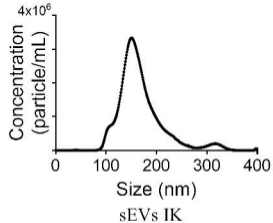

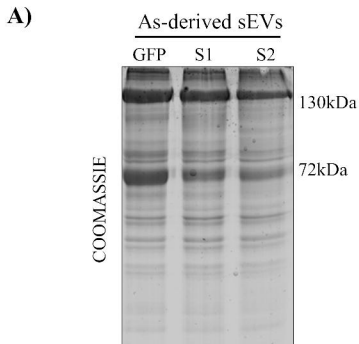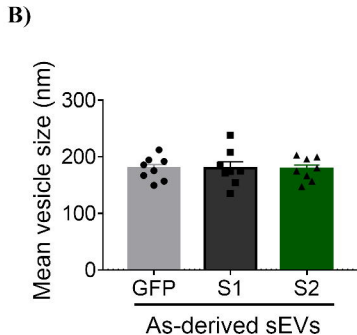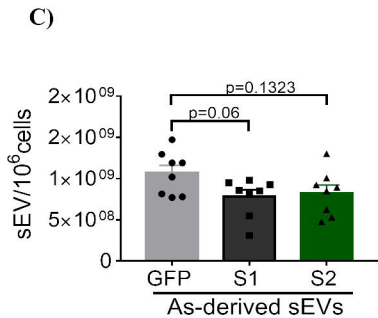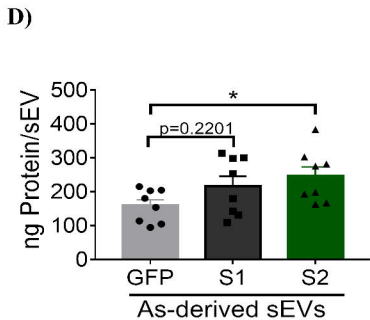

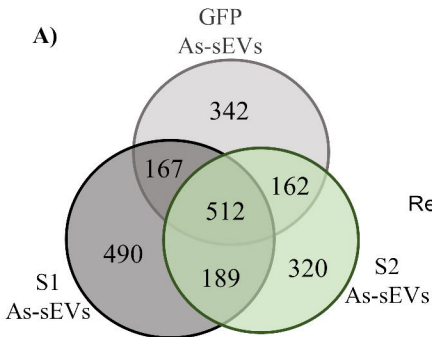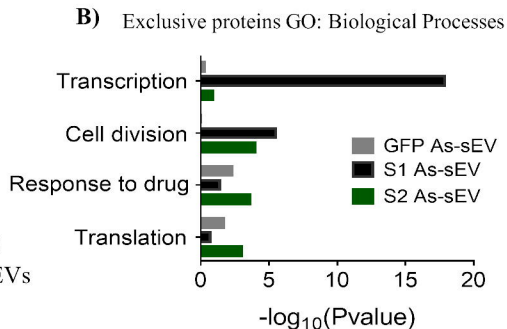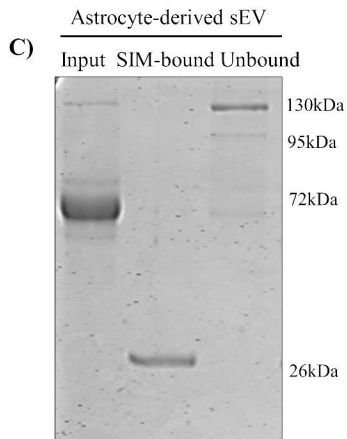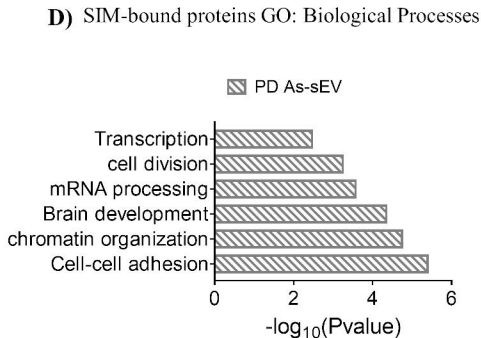

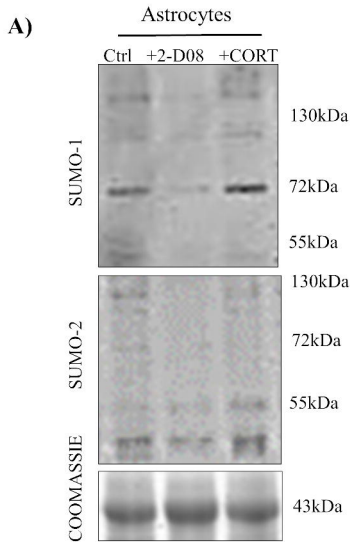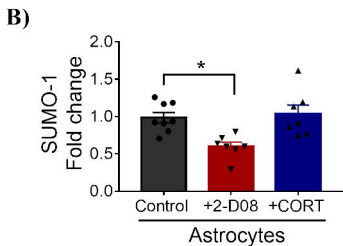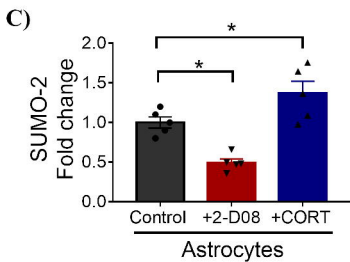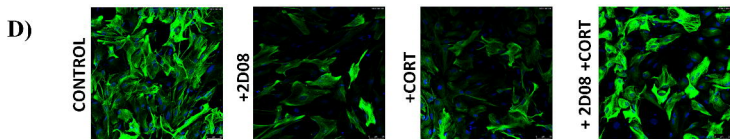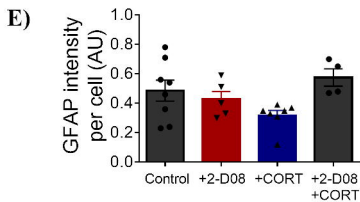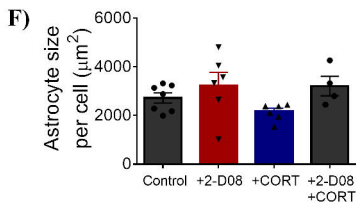



**A)**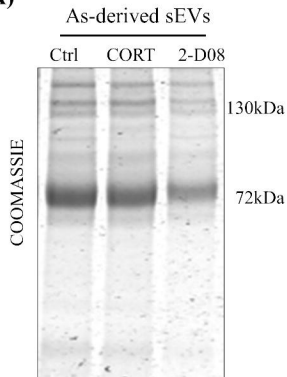**B)**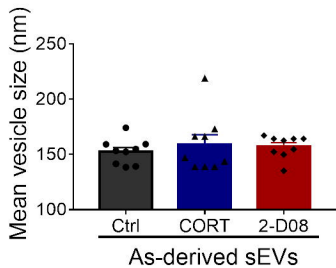**C)**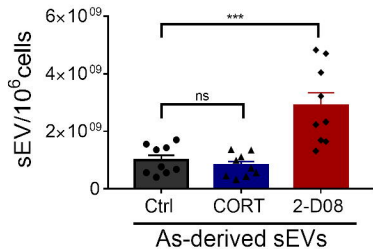**D)**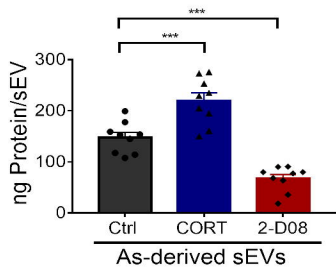

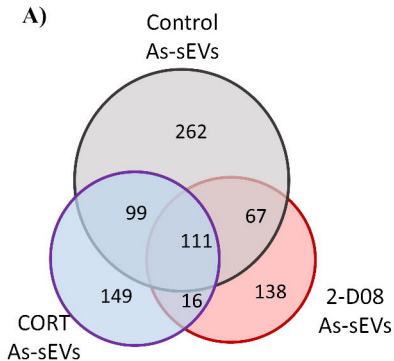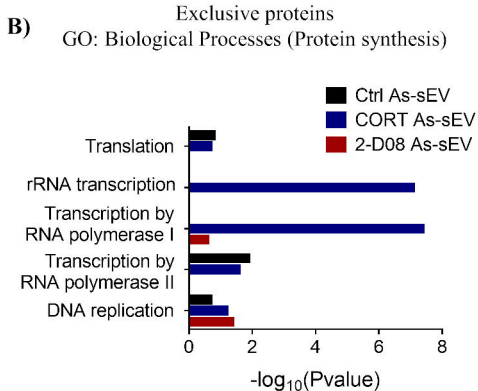

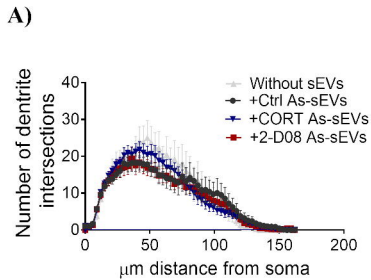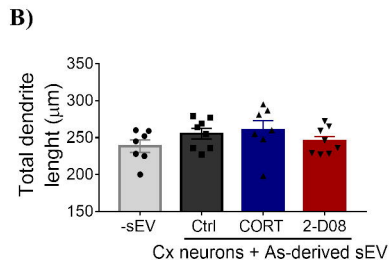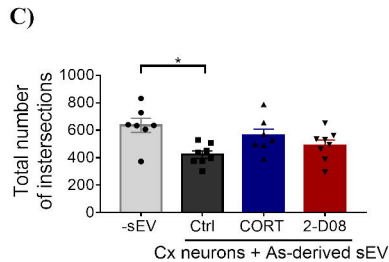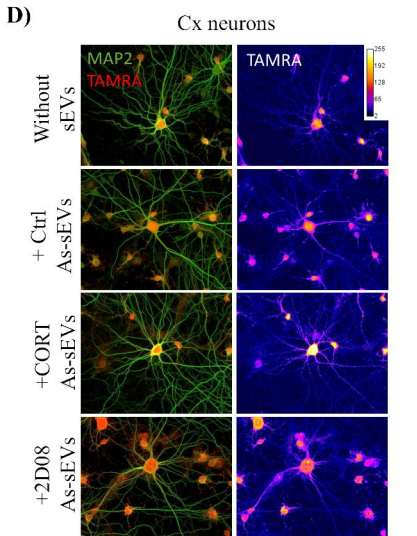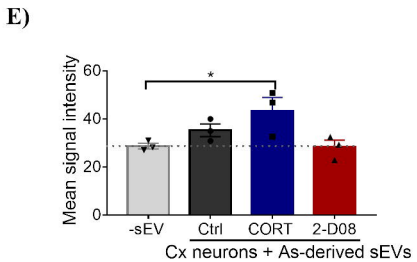

Source: https://www.biorxiv.org/content/10.1101/2020.09.15.298554v1.full.pdf
